# Supplementary material for: National Evaluation of the Association Between Resident Labor Union Participation and Surgical Resident Well-being
Source: PubMed Central journal article supplement (PMC8411294; doi:10.1001/jamanetworkopen.2021.23412), 2021-09-01
Supplement: jamanetwopen-e2123412-s001.pdf [file jamanetwopen-e2123412-s001.pdf]

## Supplementary Online Content

Brajcich BC, Chung JW, Wood DE, et al. National evaluation of the association between resident labor union participation and surgical resident well-being. *JAMA Netw Open*. 2021;4(9):e2123412. doi:10.1001/jamanetworkopen.2021.23412

**eFigure.** Response Rate Calculation

**eMethods 1.** Selected Items From Survey Administered to Residents After the 2019 ABSITE

**eMethods 2.** Rationale for Development of Instrumental Variable Regression Model

**eTable 1.** Supplementary Statistics From First Stage of Instrumental Variable Regression Models

**eTable 2.** Characteristics of Survey Respondents and Nonrespondents

**eTable 3.** Resident Outcomes for Trainees at Programs That Have Been Unionized for 3 or More Years

**eTable 4.** Residency Program Outcomes for Programs That Have Been Unionized for 3 or More Years

**eTable 5.** Comparison of the Association Between Unionization Status and Outcome Using Linear Probability Models

This supplementary material has been provided by the authors to give readers additional information about their work.

## eFigure. Response Rate Calculation

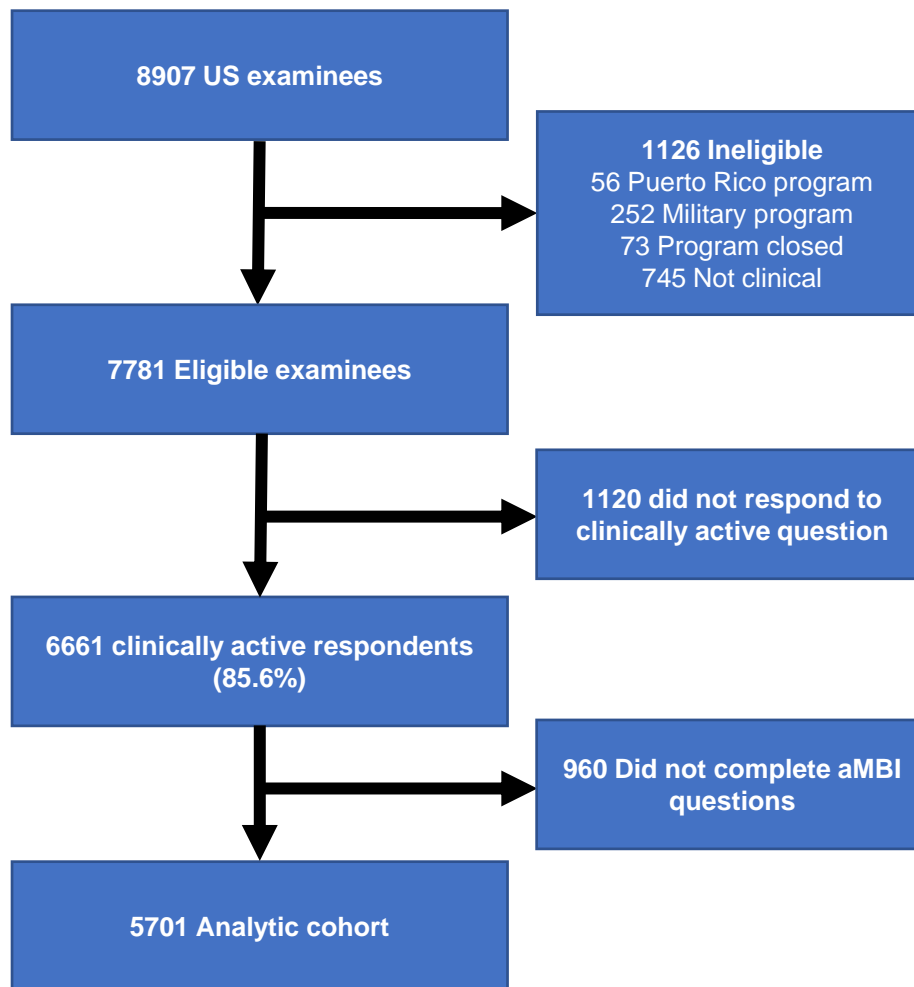

The survey response rate was calculated as the percentage of the 7781 eligible examinees who responded to the survey. Residents from Puerto Rican programs, military programs, programs which closed before unionization data was obtained, and non-clinically active residents were ineligible and were excluded from response rate calculations.

## eMethods 1. Selected Items From Survey Administered to Residents After the 2019 ABSITE

### INSTRUCTIONS

Please complete the following survey to share your thoughts about your residency experience. The information will be used to inform future research and policy decisions to improve the learning environment and culture of residency. It is estimated that it will take approximately 5 to 8 minutes to complete the questions. **The survey responses are never associated with your personal identity. All data are de-identified for analyses and reporting. Your program will not have access to your individual responses.**

|                                                                                                                                                                                          |  |
|------------------------------------------------------------------------------------------------------------------------------------------------------------------------------------------|--|
| <b>1. Are you currently enrolled in a clinically active year of your residency? This is defined as the PGY1-5 years that count toward your board eligibility.</b>                        |  |
| <input type="checkbox"/> Yes                                                                                                                                                             |  |
| <input type="checkbox"/> No, I am currently working on research (full time), obtaining an additional degree (full time), or otherwise taking a break from my clinical years of training. |  |

|                                                         |                          |
|---------------------------------------------------------|--------------------------|
| <b>2. The following describes me: (most applicable)</b> |                          |
| a. Married                                              | <input type="checkbox"/> |
| b. Not married but in a relationship                    | <input type="checkbox"/> |
| c. Not married and not in a relationship (single)       | <input type="checkbox"/> |
| d. Divorced/Separated                                   | <input type="checkbox"/> |
| e. Widowed                                              | <input type="checkbox"/> |

|                                                                      |                          |
|----------------------------------------------------------------------|--------------------------|
| <b>3. As of July 2018, how many children (under 18) do you have?</b> |                          |
| a. 0                                                                 | <input type="checkbox"/> |
| b. 1                                                                 | <input type="checkbox"/> |
| c. 2                                                                 | <input type="checkbox"/> |
| d. 3                                                                 | <input type="checkbox"/> |
| e. 4                                                                 | <input type="checkbox"/> |
| f. 5+                                                                | <input type="checkbox"/> |

|                                                                                                                           |                          |
|---------------------------------------------------------------------------------------------------------------------------|--------------------------|
| <b>4. During this academic year (July 2018 to present), were you or your partner pregnant/adopting/expecting a child?</b> |                          |
| Yes                                                                                                                       | No                       |
| <input type="checkbox"/>                                                                                                  | <input type="checkbox"/> |

|                                                          |                          |
|----------------------------------------------------------|--------------------------|
| <b>5. I identify my race as: (select all that apply)</b> |                          |
| a. American Indian or Alaska Native                      | <input type="checkbox"/> |
| b. Asian                                                 | <input type="checkbox"/> |
| c. Black or African American                             | <input type="checkbox"/> |
| d. Native Hawaiian or Other Pacific Islander             | <input type="checkbox"/> |
| e. White                                                 | <input type="checkbox"/> |
| f. Other                                                 | <input type="checkbox"/> |
| g. Prefer not to say                                     | <input type="checkbox"/> |

| 6. I identify my ethnicity as: |                          |
|--------------------------------|--------------------------|
| a. Hispanic or Latino          | <input type="checkbox"/> |
| b. Not Hispanic or Latino      | <input type="checkbox"/> |
| c. Prefer not to say           | <input type="checkbox"/> |

| 7. Overall, how many <u>months</u> have you violated the following duty hour regulations during this academic year (July 2018 to present)?                                               |                          |                          |                          |                          |                          |                          |
|------------------------------------------------------------------------------------------------------------------------------------------------------------------------------------------|--------------------------|--------------------------|--------------------------|--------------------------|--------------------------|--------------------------|
| Item                                                                                                                                                                                     | 0                        | 1                        | 2                        | 3                        | 4                        | 5+                       |
| a. Maximum 80 hours of work per week, averaged over a four-week period (including all in-house clinical and educational activities, clinical work done from home, and all moonlighting). | <input type="checkbox"/> | <input type="checkbox"/> | <input type="checkbox"/> | <input type="checkbox"/> | <input type="checkbox"/> | <input type="checkbox"/> |
| b. At least 1 day off in 7, averaged over a four-week period.                                                                                                                            | <input type="checkbox"/> | <input type="checkbox"/> | <input type="checkbox"/> | <input type="checkbox"/> | <input type="checkbox"/> | <input type="checkbox"/> |
| c. In-house call no more frequently than 1 in 3 nights, averaged over a four-week period.                                                                                                | <input type="checkbox"/> | <input type="checkbox"/> | <input type="checkbox"/> | <input type="checkbox"/> | <input type="checkbox"/> | <input type="checkbox"/> |

| 8. Please indicate the extent to which you agree with the following statements:                                                                                                        |                          |                          |                          |                          |                          |
|----------------------------------------------------------------------------------------------------------------------------------------------------------------------------------------|--------------------------|--------------------------|--------------------------|--------------------------|--------------------------|
| Item                                                                                                                                                                                   | Strongly disagree        | Disagree                 | Neutral                  | Agree                    | Strongly agree           |
| a. I have enough time for direct patient care after completion of administrative tasks (e.g., notes, orders).                                                                          | <input type="checkbox"/> | <input type="checkbox"/> | <input type="checkbox"/> | <input type="checkbox"/> | <input type="checkbox"/> |
| b. My program effectively uses support staff (e.g., advance practice providers, social workers, patient transporters, etc.) to allow me to spend more time on patient care activities. | <input type="checkbox"/> | <input type="checkbox"/> | <input type="checkbox"/> | <input type="checkbox"/> | <input type="checkbox"/> |
| c. My program protects educational time.                                                                                                                                               | <input type="checkbox"/> | <input type="checkbox"/> | <input type="checkbox"/> | <input type="checkbox"/> | <input type="checkbox"/> |
| d. Relative to my training level, I spend an appropriate amount of time in the operating room.                                                                                         | <input type="checkbox"/> | <input type="checkbox"/> | <input type="checkbox"/> | <input type="checkbox"/> | <input type="checkbox"/> |
| e. Relative to my training level, I have an appropriate level of operative autonomy.                                                                                                   | <input type="checkbox"/> | <input type="checkbox"/> | <input type="checkbox"/> | <input type="checkbox"/> | <input type="checkbox"/> |
| f. Relative to my training level, I have an appropriate level of autonomy in patient care and clinical decision-making.                                                                | <input type="checkbox"/> | <input type="checkbox"/> | <input type="checkbox"/> | <input type="checkbox"/> | <input type="checkbox"/> |
| g. My program is responsive to resident concerns.                                                                                                                                      | <input type="checkbox"/> | <input type="checkbox"/> | <input type="checkbox"/> | <input type="checkbox"/> | <input type="checkbox"/> |
| h. Overall, I believe my program takes my wellness seriously.                                                                                                                          | <input type="checkbox"/> | <input type="checkbox"/> | <input type="checkbox"/> | <input type="checkbox"/> | <input type="checkbox"/> |

| 9. Thinking back on this academic year (July 2018 to present), how satisfied were <u>you</u> with the following? |                          |                          |                          |                          |                          |
|------------------------------------------------------------------------------------------------------------------|--------------------------|--------------------------|--------------------------|--------------------------|--------------------------|
| Item                                                                                                             | Very Dissatisfied        | Dissatisfied             | Neutral                  | Satisfied                | Very Satisfied           |
| a. Quality of overall resident education.                                                                        | <input type="checkbox"/> | <input type="checkbox"/> | <input type="checkbox"/> | <input type="checkbox"/> | <input type="checkbox"/> |
| b. Time for rest.                                                                                                | <input type="checkbox"/> | <input type="checkbox"/> | <input type="checkbox"/> | <input type="checkbox"/> | <input type="checkbox"/> |
| c. Your decision to become a surgeon.                                                                            | <input type="checkbox"/> | <input type="checkbox"/> | <input type="checkbox"/> | <input type="checkbox"/> | <input type="checkbox"/> |

**10. Using the scale below, indicate the frequency with which you've experienced the following in your general surgery residency during this academic year (July 2018 to present).**

| Item                                                                                             | Never                    | Now and then             | Monthly                  | Weekly                   | Daily                    |
|--------------------------------------------------------------------------------------------------|--------------------------|--------------------------|--------------------------|--------------------------|--------------------------|
| a. Someone withholding information which affects your performance                                | <input type="checkbox"/> | <input type="checkbox"/> | <input type="checkbox"/> | <input type="checkbox"/> | <input type="checkbox"/> |
| b. Spreading of gossip and rumors about you                                                      | <input type="checkbox"/> | <input type="checkbox"/> | <input type="checkbox"/> | <input type="checkbox"/> | <input type="checkbox"/> |
| c. Being ignored or excluded                                                                     | <input type="checkbox"/> | <input type="checkbox"/> | <input type="checkbox"/> | <input type="checkbox"/> | <input type="checkbox"/> |
| d. Having insulting or offensive remarks made about your person, attitudes, or your private life | <input type="checkbox"/> | <input type="checkbox"/> | <input type="checkbox"/> | <input type="checkbox"/> | <input type="checkbox"/> |
| e. Being shouted at or being the target of spontaneous anger                                     | <input type="checkbox"/> | <input type="checkbox"/> | <input type="checkbox"/> | <input type="checkbox"/> | <input type="checkbox"/> |
| f. Repeated reminders of your errors or mistakes                                                 | <input type="checkbox"/> | <input type="checkbox"/> | <input type="checkbox"/> | <input type="checkbox"/> | <input type="checkbox"/> |
| g. Being ignored or facing a hostile reaction when you approach                                  | <input type="checkbox"/> | <input type="checkbox"/> | <input type="checkbox"/> | <input type="checkbox"/> | <input type="checkbox"/> |
| h. Persistent criticism of your work and effort                                                  | <input type="checkbox"/> | <input type="checkbox"/> | <input type="checkbox"/> | <input type="checkbox"/> | <input type="checkbox"/> |
| i. Practical jokes carried about by people you don't get along with                              | <input type="checkbox"/> | <input type="checkbox"/> | <input type="checkbox"/> | <input type="checkbox"/> | <input type="checkbox"/> |
| j. Being cursed or sworn at                                                                      | <input type="checkbox"/> | <input type="checkbox"/> | <input type="checkbox"/> | <input type="checkbox"/> | <input type="checkbox"/> |

**11. Please indicate the extent to which you agree with the following statement:**

| Item                                                                                                    | Strongly disagree        | Disagree                 | Neutral                  | Agree                    | Strongly agree           |
|---------------------------------------------------------------------------------------------------------|--------------------------|--------------------------|--------------------------|--------------------------|--------------------------|
| I have considered leaving my residency program during the current academic year (July 2018 to present). | <input type="checkbox"/> | <input type="checkbox"/> | <input type="checkbox"/> | <input type="checkbox"/> | <input type="checkbox"/> |

**12. During the past 12 months:**

|                                                | No                       | Yes                      |
|------------------------------------------------|--------------------------|--------------------------|
| Have you had thoughts of taking your own life? | <input type="checkbox"/> | <input type="checkbox"/> |

**16. Using the scale below, indicate the frequency with which you've experienced the following in your general surgery residency during this academic year (July 2018 to present).**

| Item                                                                               | Never                    | A few times a year       | Once a month or less     | A few times a month      | Once a week              | A few times a week       | Every Day                |
|------------------------------------------------------------------------------------|--------------------------|--------------------------|--------------------------|--------------------------|--------------------------|--------------------------|--------------------------|
| a. Crude/sexually demeaning or explicit remarks, stories, or jokes                 | <input type="checkbox"/> | <input type="checkbox"/> | <input type="checkbox"/> | <input type="checkbox"/> | <input type="checkbox"/> | <input type="checkbox"/> | <input type="checkbox"/> |
| b. Unwanted sexual imagery or materials sent or shown to you                       | <input type="checkbox"/> | <input type="checkbox"/> | <input type="checkbox"/> | <input type="checkbox"/> | <input type="checkbox"/> | <input type="checkbox"/> | <input type="checkbox"/> |
| c. Unwanted verbal sexual attention (e.g., comments, flirtations, sexual advances) | <input type="checkbox"/> | <input type="checkbox"/> | <input type="checkbox"/> | <input type="checkbox"/> | <input type="checkbox"/> | <input type="checkbox"/> | <input type="checkbox"/> |

|                                                                                                                                      |                          |                          |                          |                          |                          |                          |                          |
|--------------------------------------------------------------------------------------------------------------------------------------|--------------------------|--------------------------|--------------------------|--------------------------|--------------------------|--------------------------|--------------------------|
| d. Offensive body language (e.g., leering, standing too close)                                                                       | <input type="checkbox"/> | <input type="checkbox"/> | <input type="checkbox"/> | <input type="checkbox"/> | <input type="checkbox"/> | <input type="checkbox"/> | <input type="checkbox"/> |
| e. Unwanted physical sexual attention (e.g., inappropriate or uncomfortable touching; attempts to touch, fondle or kiss)             | <input type="checkbox"/> | <input type="checkbox"/> | <input type="checkbox"/> | <input type="checkbox"/> | <input type="checkbox"/> | <input type="checkbox"/> | <input type="checkbox"/> |
| f. Sexual coercion (e.g., bribed or threatened to engage in sexual behavior; suggestion of better treatment if sexually cooperative) | <input type="checkbox"/> | <input type="checkbox"/> | <input type="checkbox"/> | <input type="checkbox"/> | <input type="checkbox"/> | <input type="checkbox"/> | <input type="checkbox"/> |

**17. Using the scale below, indicate the frequency with which you've experienced the following based on your GENDER/GENDER IDENTITY/SEXUAL ORIENTATION in your general surgery residency during this academic year (July 2018 to present). These questions are NOT related to race/ethnicity/religion.**

| Item                                                                                                                                                                         | Never                    | A few times a year       | Once a month or less     | A few times a month      | Once a week              | A few times a week       | Every Day                |
|------------------------------------------------------------------------------------------------------------------------------------------------------------------------------|--------------------------|--------------------------|--------------------------|--------------------------|--------------------------|--------------------------|--------------------------|
| a. Different standards of evaluation (e.g., lowered expectations, need to work harder to achieve the same success as others, unfair punishment, less respect for my opinion) | <input type="checkbox"/> | <input type="checkbox"/> | <input type="checkbox"/> | <input type="checkbox"/> | <input type="checkbox"/> | <input type="checkbox"/> | <input type="checkbox"/> |
| b. Denied opportunities (e.g., OR cases, attendance at conferences, career options, opportunities for advancements, mentorship)                                              | <input type="checkbox"/> | <input type="checkbox"/> | <input type="checkbox"/> | <input type="checkbox"/> | <input type="checkbox"/> | <input type="checkbox"/> | <input type="checkbox"/> |
| c. Mistaken for a non-physician based on your <u>gender/gender identity/sexual orientation</u>                                                                               | <input type="checkbox"/> | <input type="checkbox"/> | <input type="checkbox"/> | <input type="checkbox"/> | <input type="checkbox"/> | <input type="checkbox"/> | <input type="checkbox"/> |
| d. Slurs and/or hurtful/humiliating/negative/uncomfortable comments even when purported as jokes                                                                             | <input type="checkbox"/> | <input type="checkbox"/> | <input type="checkbox"/> | <input type="checkbox"/> | <input type="checkbox"/> | <input type="checkbox"/> | <input type="checkbox"/> |
| e. Socially isolated (e.g., excluded from social events, malicious gossip)                                                                                                   | <input type="checkbox"/> | <input type="checkbox"/> | <input type="checkbox"/> | <input type="checkbox"/> | <input type="checkbox"/> | <input type="checkbox"/> | <input type="checkbox"/> |
| f. Was advised against having children during residency                                                                                                                      | <input type="checkbox"/> | <input type="checkbox"/> | <input type="checkbox"/> | <input type="checkbox"/> | <input type="checkbox"/> | <input type="checkbox"/> | <input type="checkbox"/> |
| g. Felt like my/my partner's pregnancy or our childcare needs led to negative reactions from my coworkers/program                                                            | <input type="checkbox"/> | <input type="checkbox"/> | <input type="checkbox"/> | <input type="checkbox"/> | <input type="checkbox"/> | <input type="checkbox"/> | <input type="checkbox"/> |

18. Using the scale below, indicate the frequency with which you've experienced the following based on your RACE/ETHNICITY/RELIGION in your general surgery residency during this academic year (July 2018 to present). These questions are NOT related to gender/gender identity/sexual orientation.

| Item                                                                                                                                                                         | Never                    | A few times a year       | Once a month or less     | A few times a month      | Once a week              | A few times a week       | Every Day                |
|------------------------------------------------------------------------------------------------------------------------------------------------------------------------------|--------------------------|--------------------------|--------------------------|--------------------------|--------------------------|--------------------------|--------------------------|
| a. Different standards of evaluation (e.g., lowered expectations, need to work harder to achieve the same success as others, unfair punishment, less respect for my opinion) | <input type="checkbox"/> | <input type="checkbox"/> | <input type="checkbox"/> | <input type="checkbox"/> | <input type="checkbox"/> | <input type="checkbox"/> | <input type="checkbox"/> |
| b. Denied opportunities (e.g., OR cases, attendance at conferences, career options, opportunities for advancements, mentorship)                                              | <input type="checkbox"/> | <input type="checkbox"/> | <input type="checkbox"/> | <input type="checkbox"/> | <input type="checkbox"/> | <input type="checkbox"/> | <input type="checkbox"/> |
| c. Mistaken for a non-physician based on your <u>race/ethnicity/religion</u>                                                                                                 | <input type="checkbox"/> | <input type="checkbox"/> | <input type="checkbox"/> | <input type="checkbox"/> | <input type="checkbox"/> | <input type="checkbox"/> | <input type="checkbox"/> |
| d. Slurs and/or hurtful/humiliating/negative/uncomfortable comments, even when purported as jokes                                                                            | <input type="checkbox"/> | <input type="checkbox"/> | <input type="checkbox"/> | <input type="checkbox"/> | <input type="checkbox"/> | <input type="checkbox"/> | <input type="checkbox"/> |
| e. Socially isolated (e.g., excluded from social events, malicious gossip)                                                                                                   | <input type="checkbox"/> | <input type="checkbox"/> | <input type="checkbox"/> | <input type="checkbox"/> | <input type="checkbox"/> | <input type="checkbox"/> | <input type="checkbox"/> |
| f. Mistaken for another person of the same race                                                                                                                              | <input type="checkbox"/> | <input type="checkbox"/> | <input type="checkbox"/> | <input type="checkbox"/> | <input type="checkbox"/> | <input type="checkbox"/> | <input type="checkbox"/> |

## eMethods 2: Rationale for Development of Instrumental Variable Regression Model

An instrumental variable modeling approach was employed in this study to account for suspected endogeneity of the variable denoting whether a program was unionized. Sources of endogeneity were hypothesized to include unmeasured confounding program characteristics which may influence the decision to unionize, and simultaneity, where outcomes related to poor working conditions or well-being may have contributed to the decision to form a union. The unionization rate of non-healthcare employees within a given region was selected as an instrumental variable for this study because it meets the following criteria:

1. It is strongly associated with the unionization status of residency programs within the region, irrespective of other confounding variables.
2. It is not itself associated with the outcomes of interest though any mechanism except program unionization status, as it does not directly affect outcomes (the instrument does not measure healthcare worker unions) and other regional confounding factors (geographic region, urban-rural classification, and where pertinent, income and housing costs) are included in the models.

The causal graph of the model is depicted below:

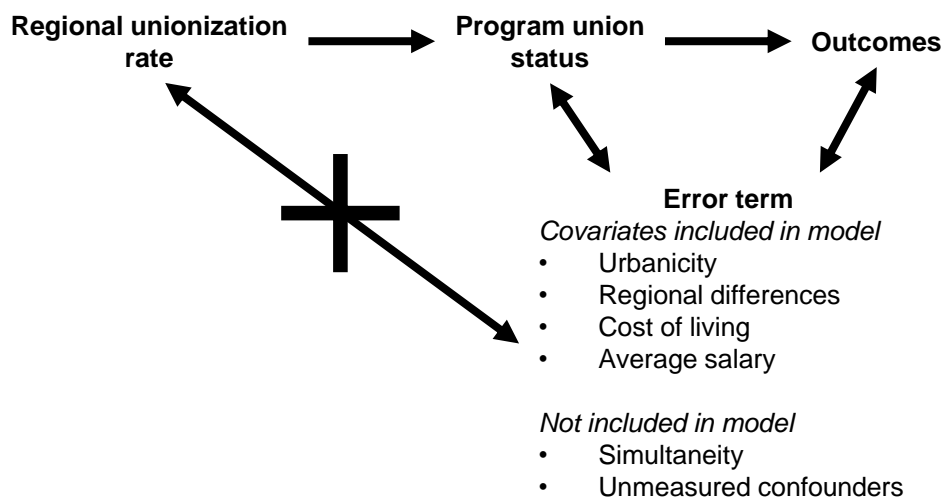

Included within the error term in the causal graph are several measured covariates which are incorporated as adjustments in models. After adjusting for these covariates, no association between the instrument (regional unionization rate) and the outcomes is believed to be present except through the primary exposure variable (program union status). The instrumental variable models used in this study can theoretically identify the direct influence of program unionization status on the outcomes independent from other unmeasured confounders (such as individual program characteristics that may confound union status and outcomes) and simultaneity, which the naïve regression models included in the manuscript are unable to do.



**eTable 1. Supplementary Statistics From First Stage of Instrumental Variable Regression Models**

| <b>Outcome</b>                                                                                                                                                                                                                                                                                       | <b>First Stage F Statistic<sup>a</sup></b> |
|------------------------------------------------------------------------------------------------------------------------------------------------------------------------------------------------------------------------------------------------------------------------------------------------------|--------------------------------------------|
| Burnout                                                                                                                                                                                                                                                                                              | 14.30                                      |
| Suicidal ideation                                                                                                                                                                                                                                                                                    | 14.30                                      |
| Job satisfaction                                                                                                                                                                                                                                                                                     |                                            |
| Thoughts of attrition                                                                                                                                                                                                                                                                                | 14.26                                      |
| Dissatisfied with decision to become a surgeon                                                                                                                                                                                                                                                       | 14.18                                      |
| Dissatisfied with time for rest                                                                                                                                                                                                                                                                      | 14.26                                      |
| Duty hour violations                                                                                                                                                                                                                                                                                 | 14.37                                      |
| Mistreatment                                                                                                                                                                                                                                                                                         |                                            |
| Any discrimination                                                                                                                                                                                                                                                                                   | 14.18                                      |
| Bullying                                                                                                                                                                                                                                                                                             | 14.07                                      |
| Sexual harassment                                                                                                                                                                                                                                                                                    | 14.44                                      |
| Educational environment                                                                                                                                                                                                                                                                              |                                            |
| Dissatisfied with educational quality                                                                                                                                                                                                                                                                | 14.27                                      |
| Inadequate time for patient care                                                                                                                                                                                                                                                                     | 14.35                                      |
| Lack of protected educational time                                                                                                                                                                                                                                                                   | 14.31                                      |
| Inadequate time in operating room                                                                                                                                                                                                                                                                    | 14.44                                      |
| Inadequate autonomy in operating room                                                                                                                                                                                                                                                                | 14.23                                      |
| Inadequate autonomy in clinical decisions                                                                                                                                                                                                                                                            | 14.22                                      |
| Lack of effective support staff                                                                                                                                                                                                                                                                      | 14.28                                      |
| Program not responsive to resident concerns                                                                                                                                                                                                                                                          | 14.32                                      |
| Program did not take wellness seriously                                                                                                                                                                                                                                                              | 14.28                                      |
| PGY-1 salary                                                                                                                                                                                                                                                                                         | 9.04                                       |
| Vacation length                                                                                                                                                                                                                                                                                      | 14.74                                      |
| Subsidized childcare                                                                                                                                                                                                                                                                                 | 14.74                                      |
| Housing stipend                                                                                                                                                                                                                                                                                      | 11.31                                      |
| Relocation stipend                                                                                                                                                                                                                                                                                   | 14.74                                      |
| Technology stipend                                                                                                                                                                                                                                                                                   | 14.74                                      |
| <i>Abbreviations: PGY, post-graduate year</i>                                                                                                                                                                                                                                                        |                                            |
| <sup>a</sup> F statistic calculated for linear probability regression models for the outcome of program unionization using regional public sector unionization as an instrument and incorporating other covariates in the model. Cluster-robust test statistics were used for resident-level models. |                                            |

**eTable 2. Characteristics of Survey Respondents and Nonrespondents**

| <b>Characteristic</b>                                                                                    | <b>Respondents<br/>(n = 6661)</b> | <b>Non-Respondents<br/>(n = 1120)</b> |
|----------------------------------------------------------------------------------------------------------|-----------------------------------|---------------------------------------|
| Gender, No. (%)                                                                                          |                                   |                                       |
| Male                                                                                                     | 3785 (56.8)                       | 614 (54.8)                            |
| Female                                                                                                   | 2692 (40.4)                       | 440 (39.3)                            |
| Missing                                                                                                  | 184 (2.8)                         | 66 (5.9)                              |
| PGY level, No. (%)                                                                                       |                                   |                                       |
| 1                                                                                                        | 1729 (26.0)                       | 423 (37.8)                            |
| 2-3                                                                                                      | 2633 (39.5)                       | 454 (40.5)                            |
| 4-5                                                                                                      | 2299 (34.5)                       | 243 (21.7)                            |
| Program type, No. (%)                                                                                    |                                   |                                       |
| Academic                                                                                                 | 3955 (59.4)                       | 682 (60.9)                            |
| Community                                                                                                | 2706 (40.6)                       | 438 (39.1)                            |
| Geographic region, No. (%)                                                                               |                                   |                                       |
| Northeast                                                                                                | 2002 (30.1)                       | 321 (28.7)                            |
| South                                                                                                    | 2067 (31.0)                       | 370 (33.0)                            |
| Midwest                                                                                                  | 1587 (23.8)                       | 265 (23.7)                            |
| West                                                                                                     | 1005 (15.1)                       | 164 (14.6)                            |
| Unionized program, No. (%)                                                                               | 825 (12.4)                        | 139 (12.4)                            |
| Urban-rural classification, No. (%)                                                                      |                                   |                                       |
| Large metropolitan core                                                                                  | 3785 (56.8)                       | 673 (60.1)                            |
| Large metropolitan fringe                                                                                | 832 (12.5)                        | 119 (10.6)                            |
| Small or medium metropolitan area                                                                        | 2044 (30.7)                       | 328 (29.3)                            |
| Program size, no. of examinees, median (IQR)                                                             | 34 (23-49)                        | 37 (24-51)                            |
| ABSITE score, mean (SD)                                                                                  | 69.5 (9.6)                        | 66.1 (10.2)                           |
| <i>Abbreviations: ABSITE, American Board of Surgery In-Training Examination; PGY, post-graduate year</i> |                                   |                                       |

**eTable 3. Resident Outcomes for Trainees at Programs That Have Been Unionized for 3 or More Years<sup>a</sup>**

| Outcome                                                                                                                                                                                                                                                                                                                                                                                                                                                                                                                                                                                                                                                                                                                                                                                                                                                                                                                          | Unionized<br>(n = 569 residents;<br>26 programs) | Non-Unionized<br>(n = 5132 residents;<br>259 programs) | Logistic<br>Regression, OR<br>(95% CI) <sup>b</sup> |
|----------------------------------------------------------------------------------------------------------------------------------------------------------------------------------------------------------------------------------------------------------------------------------------------------------------------------------------------------------------------------------------------------------------------------------------------------------------------------------------------------------------------------------------------------------------------------------------------------------------------------------------------------------------------------------------------------------------------------------------------------------------------------------------------------------------------------------------------------------------------------------------------------------------------------------|--------------------------------------------------|--------------------------------------------------------|-----------------------------------------------------|
| Burnout, No. (%)                                                                                                                                                                                                                                                                                                                                                                                                                                                                                                                                                                                                                                                                                                                                                                                                                                                                                                                 | 235 (41.3)                                       | 2237 (43.6)                                            | 0.93 (0.75-1.16)                                    |
| Suicidal ideation, No. (%)                                                                                                                                                                                                                                                                                                                                                                                                                                                                                                                                                                                                                                                                                                                                                                                                                                                                                                       | 19 (3.3)                                         | 241 (4.7)                                              | 0.64 (0.39-1.04)                                    |
| Job satisfaction                                                                                                                                                                                                                                                                                                                                                                                                                                                                                                                                                                                                                                                                                                                                                                                                                                                                                                                 |                                                  |                                                        |                                                     |
| Thoughts of attrition, No. (%)                                                                                                                                                                                                                                                                                                                                                                                                                                                                                                                                                                                                                                                                                                                                                                                                                                                                                                   | 70 (12.3)                                        | 597 (11.7)                                             | 0.97 (0.75-1.26)                                    |
| Dissatisfied with decision to become a surgeon, No. (%)                                                                                                                                                                                                                                                                                                                                                                                                                                                                                                                                                                                                                                                                                                                                                                                                                                                                          | 31 (5.5)                                         | 259 (5.1)                                              | 1.07 (0.70-1.64)                                    |
| Dissatisfied with time for rest, No. (%)                                                                                                                                                                                                                                                                                                                                                                                                                                                                                                                                                                                                                                                                                                                                                                                                                                                                                         | 117 (20.6)                                       | 932 (18.2)                                             | 0.93 (0.66-1.32)                                    |
| Duty hour violations, No. (%)                                                                                                                                                                                                                                                                                                                                                                                                                                                                                                                                                                                                                                                                                                                                                                                                                                                                                                    | 236 (42.8)                                       | 2142 (42.6)                                            | 0.86 (0.62-1.21)                                    |
| Mistreatment                                                                                                                                                                                                                                                                                                                                                                                                                                                                                                                                                                                                                                                                                                                                                                                                                                                                                                                     |                                                  |                                                        |                                                     |
| Any discrimination, No. (%) <sup>c</sup>                                                                                                                                                                                                                                                                                                                                                                                                                                                                                                                                                                                                                                                                                                                                                                                                                                                                                         | 274 (52.5)                                       | 2560 (53.7)                                            | 0.82 (0.64-1.04)                                    |
| Bullying, No. (%)                                                                                                                                                                                                                                                                                                                                                                                                                                                                                                                                                                                                                                                                                                                                                                                                                                                                                                                | 368 (67.0)                                       | 3367 (67.0)                                            | 0.92 (0.74-1.15)                                    |
| Sexual harassment, No. (%)                                                                                                                                                                                                                                                                                                                                                                                                                                                                                                                                                                                                                                                                                                                                                                                                                                                                                                       | 137 (24.9)                                       | 1558 (31.3)                                            | 0.72 (0.56-0.92)                                    |
| Educational environment                                                                                                                                                                                                                                                                                                                                                                                                                                                                                                                                                                                                                                                                                                                                                                                                                                                                                                          |                                                  |                                                        |                                                     |
| Dissatisfied with educational quality, No. (%)                                                                                                                                                                                                                                                                                                                                                                                                                                                                                                                                                                                                                                                                                                                                                                                                                                                                                   | 88 (15.5)                                        | 473 (9.2)                                              | 1.50 (1.02-2.20)                                    |
| Inadequate time for patient care, No. (%)                                                                                                                                                                                                                                                                                                                                                                                                                                                                                                                                                                                                                                                                                                                                                                                                                                                                                        | 78 (13.8)                                        | 479 (9.4)                                              | 1.27 (0.92-1.76)                                    |
| Lack of protected educational time, No. (%)                                                                                                                                                                                                                                                                                                                                                                                                                                                                                                                                                                                                                                                                                                                                                                                                                                                                                      | 102 (18.3)                                       | 632 (12.4)                                             | 1.55 (0.97-2.46)                                    |
| Inadequate time in operating room, No. (%)                                                                                                                                                                                                                                                                                                                                                                                                                                                                                                                                                                                                                                                                                                                                                                                                                                                                                       | 81 (14.4)                                        | 375 (7.4)                                              | 1.62 (1.01-2.60)                                    |
| Inadequate autonomy in operating room, No. (%)                                                                                                                                                                                                                                                                                                                                                                                                                                                                                                                                                                                                                                                                                                                                                                                                                                                                                   | 61 (10.9)                                        | 449 (8.9)                                              | 0.98 (0.58-1.66)                                    |
| Inadequate autonomy in clinical decisions, No. (%)                                                                                                                                                                                                                                                                                                                                                                                                                                                                                                                                                                                                                                                                                                                                                                                                                                                                               | 29 (5.2)                                         | 215 (4.2)                                              | 1.08 (0.57-2.03)                                    |
| Lack of effective support staff, No. (%)                                                                                                                                                                                                                                                                                                                                                                                                                                                                                                                                                                                                                                                                                                                                                                                                                                                                                         | 167 (29.7)                                       | 802 (15.7)                                             | 1.94 (1.26-2.97) <sup>d</sup>                       |
| Program not responsive to resident concerns, No. (%)                                                                                                                                                                                                                                                                                                                                                                                                                                                                                                                                                                                                                                                                                                                                                                                                                                                                             | 56 (9.9)                                         | 372 (7.3)                                              | 1.15 (0.74-1.77)                                    |
| Program did not take wellness seriously, No. (%)                                                                                                                                                                                                                                                                                                                                                                                                                                                                                                                                                                                                                                                                                                                                                                                                                                                                                 | 67 (11.9)                                        | 393 (7.7)                                              | 1.39 (0.94-2.07)                                    |
| <sup>a</sup> Each row represents a separate model assessing the association of unionization status with each outcome. Residents with missing responses for the following outcomes were excluded from the model for that outcome: thoughts of attrition (n = 16), dissatisfaction with decision to become a surgeon (n = 12), dissatisfaction with time for rest (n = 9), duty hour violations (n = 118), discrimination (n = 414), bullying (n = 127), sexual harassment (n = 165), dissatisfaction with educational quality (n = 10), inadequate time for patient care (n = 33), protected educational time (n = 64), inadequate time in operating room (n = 63), inadequate autonomy in operating room (n = 64), inadequate autonomy in clinical decisions (n = 47), lack of effective support staff (n = 34), program non-responsiveness to resident concerns (n = 51), and program did not take wellness seriously (n = 37). |                                                  |                                                        |                                                     |
| <sup>b</sup> Logistic regression models estimated odds ratio for outcome among residents at programs unionized for more than 3 years compared with programs that are not unionized or have been unionized for less than 3 years. Covariates included gender, race, Hispanic ethnicity, relationship status, parental status, census region, urban-rural classification, and program size. Odds ratios greater than 1 indicate worse outcome at unionized programs.                                                                                                                                                                                                                                                                                                                                                                                                                                                               |                                                  |                                                        |                                                     |
| <sup>c</sup> Includes discrimination based on gender, gender identity, sexual orientation, race, ethnicity, and religion.                                                                                                                                                                                                                                                                                                                                                                                                                                                                                                                                                                                                                                                                                                                                                                                                        |                                                  |                                                        |                                                     |
| <sup>d</sup> Remains significant after Bonferroni adjustment for multiple comparisons                                                                                                                                                                                                                                                                                                                                                                                                                                                                                                                                                                                                                                                                                                                                                                                                                                            |                                                  |                                                        |                                                     |

**eTable 4. Residency Program Outcomes for Programs That Have Been Unionized for 3 or More Years<sup>a</sup>**

| <b>Outcome</b>                                                                                                                                                                                                                                                                                                                                                                                                                       | <b>Unionized<br/>(n = 25)</b> | <b>Non-Unionized<br/>(n = 252)</b> | <b>Linear Regression,<br/>mean difference (95% CI)<sup>b</sup></b> |
|--------------------------------------------------------------------------------------------------------------------------------------------------------------------------------------------------------------------------------------------------------------------------------------------------------------------------------------------------------------------------------------------------------------------------------------|-------------------------------|------------------------------------|--------------------------------------------------------------------|
| Salary, mean (SD), \$                                                                                                                                                                                                                                                                                                                                                                                                                | 61 625 (3903)                 | 57 894 (4760)                      | 205 (-1430 to 1841)                                                |
|                                                                                                                                                                                                                                                                                                                                                                                                                                      |                               |                                    |                                                                    |
| <b>Outcome</b>                                                                                                                                                                                                                                                                                                                                                                                                                       | <b>Unionized<br/>(n = 25)</b> | <b>Non-Unionized<br/>(n = 174)</b> | <b>Logistic Regression,<br/>OR (95% CI)<sup>c</sup></b>            |
| Vacation length, No. (%)                                                                                                                                                                                                                                                                                                                                                                                                             |                               |                                    |                                                                    |
| Less than 4 weeks                                                                                                                                                                                                                                                                                                                                                                                                                    | 23 (92)                       | 56 (32)                            | 14.14 (2.95-67.84) <sup>d</sup>                                    |
| 4 weeks                                                                                                                                                                                                                                                                                                                                                                                                                              | 2 (8)                         | 118 (68)                           |                                                                    |
| Subsidized childcare, No. (%)                                                                                                                                                                                                                                                                                                                                                                                                        | 0 (0)                         | 16 (9)                             | NE                                                                 |
| Housing stipend, No. (%)                                                                                                                                                                                                                                                                                                                                                                                                             | 8 (32)                        | 12 (7)                             | 1.85 (0.50-6.83)                                                   |
| Relocation stipend, No. (%)                                                                                                                                                                                                                                                                                                                                                                                                          | 0 (0)                         | 22 (13)                            | NE                                                                 |
| Technology stipend, No. (%)                                                                                                                                                                                                                                                                                                                                                                                                          | 11 (44)                       | 78 (45)                            | 0.78 (0.30-2.01)                                                   |
| <i>Abbreviations: NE, not estimable</i>                                                                                                                                                                                                                                                                                                                                                                                              |                               |                                    |                                                                    |
| <sup>a</sup> Each row represents a separate model assessing the association of unionization status with each outcome. Nine programs without available salary data were excluded, resulting in 277 programs available for analysis. For benefits, only programs for which data were available through the AMA FREIDA database or a publicly available union contract were included, resulting in 199 programs available for analysis. |                               |                                    |                                                                    |
| <sup>b</sup> Linear regression model of salary for programs which have been unionized for more than 3 years compared with programs which are not unionized (n = 170) or have been unionized for 3 or fewer years (n = 4). Covariates included program size, program type, census region, urban-rural classification, and county median household income as covariates.                                                               |                               |                                    |                                                                    |
| <sup>c</sup> Logistic regression models estimated odds ratio for residents at programs which have been unionized for more than 3 years compared with programs which are not unionized (n = 170) or have been unionized for 3 or fewer years (n = 4). Covariates included program size, program type, and urban-rural classification as covariates. For the housing stipend model, county-level median rent was also included.        |                               |                                    |                                                                    |
| <sup>d</sup> Remains significant after Bonferroni adjustment for multiple comparisons.                                                                                                                                                                                                                                                                                                                                               |                               |                                    |                                                                    |

**eTable 5. Comparison of the Association Between Unionization Status and Outcome Using Linear Probability Models<sup>a</sup>**

| Outcome                                                                                                                                                                                                 | Naïve Linear Probability Model, difference in probability (95% CI) | IV Linear Probability Model, difference in probability (95% CI) | Absolute Difference† | Relative Difference, % <sup>b</sup> |
|---------------------------------------------------------------------------------------------------------------------------------------------------------------------------------------------------------|--------------------------------------------------------------------|-----------------------------------------------------------------|----------------------|-------------------------------------|
| Burnout                                                                                                                                                                                                 | -0.02 (-0.07 to 0.03)                                              | 0.15 (-0.11 to 0.42)                                            | 0.17                 | -850%                               |
| Suicidal ideation                                                                                                                                                                                       | -0.02 (-0.03 to 0.00)                                              | -0.08 (-0.17 to 0.01)                                           | 0.10                 | -1000%                              |
| Job satisfaction                                                                                                                                                                                        |                                                                    |                                                                 |                      |                                     |
| Thoughts of attrition                                                                                                                                                                                   | 0.00 (-0.03 to 0.03)                                               | 0.08 (-0.09 to 0.24)                                            | 0.08                 | NE                                  |
| Dissatisfied with decision to become a surgeon                                                                                                                                                          | 0.00 (-0.02 to 0.02)                                               | 0.11 (0.00 to 0.23)                                             | 0.11                 | NE                                  |
| Dissatisfied with time for rest                                                                                                                                                                         | 0.00 (-0.05 to 0.06)                                               | -0.07 (-0.28 to 0.13)                                           | -0.07                | NE                                  |
| Duty hour violations                                                                                                                                                                                    | -0.03 (-0.10 to 0.04)                                              | -0.30 (-0.65 to 0.05)                                           | -0.27                | 900%                                |
| Mistreatment                                                                                                                                                                                            |                                                                    |                                                                 |                      |                                     |
| Any discrimination <sup>c</sup>                                                                                                                                                                         | -0.02 (-0.06 to 0.02)                                              | -0.05 (-0.23 to 0.13)                                           | -0.03                | 150%                                |
| Bullying                                                                                                                                                                                                | -0.03 (-0.08 to 0.01)                                              | 0.05 (-0.23 to 0.33)                                            | 0.08                 | -267%                               |
| Sexual harassment                                                                                                                                                                                       | -0.07 (-0.11 to -0.03) <sup>d</sup>                                | -0.07 (-0.27 to 0.12)                                           | 0.00                 | 0%                                  |
| Educational environment                                                                                                                                                                                 |                                                                    |                                                                 |                      |                                     |
| Dissatisfied with educational quality                                                                                                                                                                   | 0.05 (0.00 to 0.09)                                                | 0.05 (-0.14 to 0.24)                                            | 0.00                 | 0%                                  |
| Inadequate time for patient care                                                                                                                                                                        | 0.03 (0.00 to 0.07)                                                | -0.02 (-0.17 to 0.12)                                           | -0.05                | -167%                               |
| Lack of protected educational time                                                                                                                                                                      | 0.05 (-0.01 to 0.11)                                               | 0.00 (-0.23 to 0.23)                                            | -0.05                | -100%                               |
| Inadequate time in operating room                                                                                                                                                                       | 0.04 (-0.01 to 0.09)                                               | 0.00 (-0.15 to 0.16)                                            | -0.04                | -100%                               |
| Inadequate autonomy in operating room                                                                                                                                                                   | 0.01 (-0.03 to 0.06)                                               | 0.00 (-0.20 to 0.20)                                            | -0.01                | -100%                               |
| Inadequate autonomy in clinical decisions                                                                                                                                                               | 0.01 (-0.02 to 0.04)                                               | -0.03 (-0.14 to 0.09)                                           | -0.04                | -400%                               |
| Lack of effective support staff                                                                                                                                                                         | 0.09 (0.01 to 0.16)                                                | -0.01 (-0.22 to 0.21)                                           | -0.10                | -111%                               |
| Program not responsive to resident concerns                                                                                                                                                             | 0.02 (-0.02 to 0.05)                                               | 0.03 (-0.11 to 0.16)                                            | 0.01                 | 50%                                 |
| Program did not take wellness seriously                                                                                                                                                                 | 0.04 (0.00 to 0.07)                                                | 0.01 (-0.13 to 0.15)                                            | -0.03                | -75%                                |
| Benefits                                                                                                                                                                                                |                                                                    |                                                                 |                      |                                     |
| Vacation length                                                                                                                                                                                         | 0.55 (0.37 to 0.72) <sup>d</sup>                                   | 0.77 (0.09 to 1.45)                                             | 0.22                 | 40%                                 |
| Subsidized childcare                                                                                                                                                                                    | -0.08 (-0.19 to 0.03)                                              | -0.07 (-0.50 to 0.37)                                           | 0.01                 | -13%                                |
| Housing stipend                                                                                                                                                                                         | 0.27 (0.15 to 0.39)                                                | 0.62 (0.04 to 1.20)                                             | 0.35                 | 130%                                |
| Relocation stipend                                                                                                                                                                                      | 0.04 (-0.09 to 0.16)                                               | 0.24 (-0.26 to 0.74)                                            | 0.20                 | 500%                                |
| Technology stipend                                                                                                                                                                                      | -0.03 (-0.23 to 0.18)                                              | -0.60 (-1.46 to 0.26)                                           | -0.57                | 1900%                               |
| <i>Abbreviations: NE, not estimable</i>                                                                                                                                                                 |                                                                    |                                                                 |                      |                                     |
| <sup>a</sup> Each outcome is assessed as using a linear probability model to permit comparison of coefficients between naïve and IV models. CI denotes confidence interval.                             |                                                                    |                                                                 |                      |                                     |
| <sup>b</sup> Absolute and relative difference reflects difference in estimates from IV regression models versus naïve models. NE denotes not able to be estimated (due to a naïve model estimate of 0). |                                                                    |                                                                 |                      |                                     |
| <sup>c</sup> Includes discrimination based on gender, gender identity, sexual orientation, race, ethnicity, and religion.                                                                               |                                                                    |                                                                 |                      |                                     |
| <sup>d</sup> Remains significant after Bonferroni correction for multiple comparisons.                                                                                                                  |                                                                    |                                                                 |                      |                                     |
